# Supplementary material for: Help-seeking behaviours among older adults: a scoping review protocol
Source: PubMed Central journal article supplement — BMJ Open. 2021 Feb 16;11(2):e043554. doi: 10.1136/bmjopen-2020-043554 (PMC7888354; doi:10.1136/bmjopen-2020-043554), 2021-02-16
Supplement: bmjopen-2020-043554.draft_revisions.pdf [file bmjopen-2020-043554.draft_revisions.pdf]

# BMJ Open

BMJ Open is committed to open peer review. As part of this commitment we make the peer review history of every article we publish publicly available.

When an article is published we post the peer reviewers' comments and the authors' responses online. We also post the versions of the paper that were used during peer review. These are the versions that the peer review comments apply to.

The versions of the paper that follow are the versions that were submitted during the peer review process. They are not the versions of record or the final published versions. They should not be cited or distributed as the published version of this manuscript.

BMJ Open is an open access journal and the full, final, typeset and author-corrected version of record of the manuscript is available on our site with no access controls, subscription charges or pay-per-view fees (<http://bmjopen.bmj.com>).

If you have any questions on BMJ Open's open peer review process please email [info.bmjopen@bmj.com](mailto:info.bmjopen@bmj.com)

# BMJ Open

## Help-seeking Behaviors among Older Adults: A Scoping Review Protocol

|                               |                                                                                                                                                                                                                                                                                                  |
|-------------------------------|--------------------------------------------------------------------------------------------------------------------------------------------------------------------------------------------------------------------------------------------------------------------------------------------------|
| Journal:                      | <i>BMJ Open</i>                                                                                                                                                                                                                                                                                  |
| Manuscript ID                 | bmjopen-2020-043554                                                                                                                                                                                                                                                                              |
| Article Type:                 | Protocol                                                                                                                                                                                                                                                                                         |
| Date Submitted by the Author: | 07-Aug-2020                                                                                                                                                                                                                                                                                      |
| Complete List of Authors:     | Teo, Kelly; Simon Fraser University - Vancouver<br>Churchill, Ryan; Simon Fraser University - Vancouver<br>Riadi, Indira; Simon Fraser University - Vancouver<br>Kervin, Lucy; Simon Fraser University - Vancouver<br>Cosco, Theodore; Simon Fraser University - Vancouver; University of Oxford |
| Keywords:                     | GERIATRIC MEDICINE, PRIMARY CARE, PUBLIC HEALTH                                                                                                                                                                                                                                                  |
|                               |                                                                                                                                                                                                                                                                                                  |

SCHOLARONE™  
Manuscripts

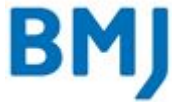

I, the Submitting Author has the right to grant and does grant on behalf of all authors of the Work (as defined in the below author licence), an exclusive licence and/or a non-exclusive licence for contributions from authors who are: i) UK Crown employees; ii) where BMJ has agreed a CC-BY licence shall apply, and/or iii) in accordance with the terms applicable for US Federal Government officers or employees acting as part of their official duties; on a worldwide, perpetual, irrevocable, royalty-free basis to BMJ Publishing Group Ltd ("BMJ") its licensees and where the relevant Journal is co-owned by BMJ to the co-owners of the Journal, to publish the Work in this journal and any other BMJ products and to exploit all rights, as set out in our [licence](#).

The Submitting Author accepts and understands that any supply made under these terms is made by BMJ to the Submitting Author unless you are acting as an employee on behalf of your employer or a postgraduate student of an affiliated institution which is paying any applicable article publishing charge ("APC") for Open Access articles. Where the Submitting Author wishes to make the Work available on an Open Access basis (and intends to pay the relevant APC), the terms of reuse of such Open Access shall be governed by a Creative Commons licence – details of these licences and which [Creative Commons](#) licence will apply to this Work are set out in our licence referred to above.

Other than as permitted in any relevant BMJ Author's Self Archiving Policies, I confirm this Work has not been accepted for publication elsewhere, is not being considered for publication elsewhere and does not duplicate material already published. I confirm all authors consent to publication of this Work and authorise the granting of this licence.

1  
2  
3  
4 **Article Title:** Help-seeking Behaviors among Older Adults: A Scoping Review Protocol  
5

6 **Corresponding Author:**  
7

8 Kelly Teo  
9 Simon Fraser University  
10 Department of Gerontology  
11 #2800-515 West Hastings St.  
12 Vancouver, British Columbia, Canada  
13 V6B 5K3  
14 [kteo@sfu.ca](mailto:kteo@sfu.ca)  
15

16  
17  
18 **Co-authors:**  
19

20 Ryan Churchill, Department of Gerontology, Simon Fraser University, Vancouver, Canada  
21

22 Indira Riadi, Department of Gerontology, Simon Fraser University, Vancouver, Canada  
23

24 Lucy Kervin, Department of Gerontology, Simon Fraser University, Vancouver, Canada  
25

26 Theodore D. Cosco, Department of Gerontology, Simon Fraser University, Vancouver, Canada  
27  
28

29 **Word Count:** 2042  
30  
31  
32  
33  
34  
35  
36  
37  
38  
39  
40  
41  
42  
43  
44  
45  
46  
47  
48  
49  
50  
51  
52  
53  
54  
55  
56  
57  
58  
59  
60

## Abstract

*Introduction.* Despite evidence that illustrates the unmet healthcare needs of older adults, there is limited research examining their help-seeking behavior, of which direct intervention can improve patient outcomes. Research in this area conducted with a focus on ethnic minority older adults is also needed, as their help-seeking behaviors may be influenced by various cultural factors. This scoping review aims to explore the current literature on the factors associated with help-seeking behaviors of older adults, and how cultural values and backgrounds may impact ethnic minority older adults' help-seeking behaviors in different ways.

*Methods and analysis.* The scoping review process will be guided by the methodology framework of Arksey and O'Malley and the PRISMA-ScR guidelines. The following electronic databases will be systematically searched from January 2005 onwards: MEDLINE/PubMed, Web of Science, PsycINFO, CINAHL, and Scopus. Studies of various designs and methodologies consisting of older adults aged 65 years or older, who are exhibiting help-seeking behaviors for the purpose of remedying a physical or mental health challenge will be considered for inclusion. Two reviewers will screen full texts and chart data. The results of this scoping review will be summarized quantitatively through numerical counts and qualitatively through a narrative synthesis.

*Ethics and dissemination.* As this is a scoping review of published literature, ethics approval is not required. Results will be disseminated through publication in a peer-reviewed journal.

*Discussion.* This scoping review will synthesize the current literature related to the help-seeking behaviors of older adults and ethnic minority older adults. It will identify current gaps in research and potential ways to move forward in developing or implementing strategies that support the various health needs of the diverse older adult population.

*Registration.* This scoping review protocol has been registered with the Open Science Framework (<https://osf.io/69kmx>).

## Strengths and Limitations of this study

- To our knowledge, no previous scoping review has explored the help-seeking behaviors of older adults or spoken to the factors that may impact ethnic minority older adults and their help-seeking behaviors differently
- This study protocol is guided by the methodology framework of Arksey and O'Malley and will follow a systematic approach to data synthesis
- The review will be limited to studies conducted in English and within the last 15 years to capture both the current health context and the dynamic nature of this topic
- Due to the scoping review design, quality assessments of the included articles will not be performed
- While there may be little published work in this topic area that will limit the amount of data available, this synthesis of knowledge will serve as a basis for future research and calls to action

## Introduction

Older adults encounter a number of physical and mental health challenges that often require more attention due to their persistent and chronic nature[1]. As a result, older adults use healthcare services at higher rates and account for more of the healthcare expenditures compared to younger populations[2]. Despite this, there is concern that not all older adults adequately access healthcare services, and that this population still experiences difficulties in achieving health and have unmet needs[3]. For example, various studies have found that older adults access mental health services at lower rates than expected, and certain illnesses, such as dementia and glaucoma, continue to go underdiagnosed and undertreated for this group[3-5]. Reasons for these unmet needs remain unclear in the literature and evidence is scarce[3,6]. Woods et al.[3] suggested that unmet care needs among older adults may be attributed to either the limited offers of support from healthcare providers or the lack of acceptance of such support from older adults. Another potential contributor to this knowledge gap is the fact that most studies focus on samples of older adults who are already existing service users, thereby limiting the information available on older adults that do not seek help in the first place[6]. Consequently, there is a clear lack of research examining older adults' decision making processes prior to seeking help, as well as what alternatives to formal support services these individuals may utilize instead[6]. As such, in exploring unmet needs of older adults, understanding their help-seeking behavior is one of the direct areas where intervention can improve patient outcomes[7].

In exploring help-seeking behavior among older adults, it is important to acknowledge and explore the differing experiences of ethnic minorities, due to their continued lack of representation in clinical and health research[8]. Ethnicity itself is a topic that has far-reaching cultural effects and encompasses many social issues such as stigma and discrimination that may influence help-seeking attitudes and disparities in care. For example, among ethnic minority adolescents, studies have shown that discrimination by authorities and health care providers, traditional and cultural beliefs about mental illness, and family obligation values impact their help-seeking behavior and underutilization of services[9-11]. Furthermore, ethnic minority groups have been found to employ alternative and pluralistic help-seeking strategies as opposed to formal primary care services[12]. Given these factors explored among younger ethnic minority groups, there is reason to believe that attitudes and experiences of help-seeking for ethnic minority older adults are similarly shaped by their cultural backgrounds, values, and traditions. Subsequently, these cultural factors influence their health outcomes and the types of support that they prefer to seek out. As such, combined with the challenges that older adults already face with increasing age, there is a need to understand what factors influence ethnic minority older adults' help-seeking behavior.

This scoping review intends to explore the following research question: Which factors are associated with help-seeking behavior among older adults? This review also aims to provide answers for the following subquestion: How do cultural backgrounds, values, and differences impact help-seeking behavior among various older adult populations? Due to the exploratory nature of these questions, a scoping review will be conducted to assess the breadth of knowledge in this area. Synthesizing this literature can help researchers, healthcare providers and key decision makers understand the current state of knowledge, identify areas for future research, and determine potential ways to influence the help-seeking behavior of older adults.

## Methods and analysis

This scoping review will be prepared in accordance with the Preferred Reporting Items for Systematic Reviews and Meta-analysis Protocols Extension for Scoping Reviews (PRISMA-ScR) guidelines[13]. A scoping review is a systematic way of exploring a topic area, in which main concepts and knowledge gaps are identified within a developing field of research[13]. Unlike systematic reviews, the research questions for a scoping review are often broader and more exploratory[13] and thus appropriate for this topic due to the limited research and lack of synthesized knowledge.

The review process will be guided by the five main steps set forth by Arksey and O'Malley[14]: (1) identifying the research question, (2) identifying relevant studies, (3) study selection, (4) charting the data and (5) collating, summarizing and reporting the results. The optional sixth stage, (6) consultation, will not be undertaken. This review has been registered with the Open Science Framework (<https://osf.io/69kmx>).

### *Step 1: Identifying the research question*

For the purpose of this scoping review, the definition of help-seeking behavior will be adapted from a World Health Organization study that examined the help-seeking behavior of adolescents[15] and will be defined in the following manner[16-17]: Any action taken by an older adult who perceives themselves as having a physical or mental health challenge, with the intent to find an appropriate remedy. The type of support that individuals pursue can include seeking formal support services (e.g. from clinicians, psychologists, counselors, religious leaders) or informal support services (e.g. from family, friends, the Internet).

In keeping with the exploratory nature of scoping reviews, we identified one main research question: Which factors are associated with help-seeking behavior among older adults? As part of this, this review will also explore an additional subquestion: How do cultural backgrounds, values, and differences impact help-seeking behavior among various older adult populations?

### *Step 2: Identifying relevant studies*

The following electronic databases will be systematically searched: MEDLINE/PubMed, Web of Science, PsycINFO, CINAHL, and Scopus. Help-seeking behavior originated from the term 'illness behavior' in medical sociology[17]. While one of the earliest definitions of help-seeking behavior was provided in 1982 and a Willingness to Seek Help Questionnaire was created in 1999, an improved General Help-Seeking Questionnaire was created in 2005 to address previous methodological and instrumental constraints[17-19]. As such, searches will be limited from January 2005 to the date of search commencement to ensure that the literature reflects the current health context and the nature of this dynamic process.

Title, abstract and keyword fields will be searched using a combination of the following terms: ("help seek\*" OR "treatment seek\*" OR "health information seek\*" OR "healthcare seek\*" OR "care seek\*" OR "health seek\*") AND ("older adults" OR "older people" OR "elderly" OR "seniors" OR "geriatrics" OR "immigrant older adults" OR "ethnic minority older

adults”). The reference lists of the included articles will also be reviewed to ensure that all relevant articles have been included. Additional search strategies may be incorporated as the review progresses and any additions or changes will be documented.

### *Step 3: Study selection*

Two reviewers will screen all articles identified from the databases independently. Titles and abstracts will be reviewed based on the initial search and included based on the eligibility criteria described below. Duplicate articles will be removed, and full texts will be examined to create a final list of included studies. Any disagreements on the inclusion of any articles will be resolved through discussion and in consultation with a third reviewer if necessary.

#### Eligibility Criteria

Studies of various designs and methodologies (i.e. quantitative, qualitative, mixed methods design, systematic reviews, meta-analyses, literature reviews) will be considered for this review. Included studies must (1) address research on the help-seeking behaviors of older adults, (2) be published from January 2005 to the date of search commencement, (3) be printed in English, and (4) be full-text peer-reviewed studies. Articles outside of those defined in the inclusion criteria, such as opinion articles, dissertations, conference proceedings or discussion papers will be excluded.

In addition, the reviewed literature must include populations of (1) older adults aged 65 years or older, (2) community-dwelling older adults, (3) older adults experiencing a physical and/or mental health challenge, and (4) older adults exhibiting help-seeking behaviors or experiencing barriers/challenges to help-seeking. Literature including those aged less than 65 years old, hospitalized patients, older adults living in nursing homes or other long-term care facilities as well as non-human studies will be excluded.

### *Step 4: Charting the data*

Data from the identified studies will be collected and charted according to key themes. From each eligible article, the reviewers will include authorship, year and journal of publication, the general characteristics of participants (i.e. age, gender and ethnicity), geographic location of study, study methods, the identified barriers or facilitators associated with help-seeking behaviors, limitations and any other key findings. A combination of Excel and a reference management software will be used to chart the data and to manage the screening process.

### *Step 5: Collating, summarizing, and reporting the results*

Risk of bias will not be assessed, as this scoping review is only intended to provide an overview of the existing literature, and not to critically appraise the included articles. However, we will include a discussion of any limitations found in the included body of evidence.

The results of this scoping review will be summarized quantitatively through numerical counts (i.e. to highlight the amount and type of studies reviewed) and qualitatively through a narrative synthesis. Tables and/or charts will be used to map the study findings and provide an overview, and the screening process will be visualized through a flowchart. Given the



1  
2  
3 exploratory nature of this study, any factors related to help-seeking will be considered for  
4 review. Facilitators to help-seeking will be defined as any factor that has been shown to support  
5 or encourage an older adult to seek help for their mental and/or physical health challenges.  
6 Barriers to help-seeking will be defined as any factor that has been shown to prevent or  
7 discourage an older adult from seeking help for their mental and/or physical health challenges.  
8 These factors could include, but will not be limited to, the following: the presence or absence of  
9 caregivers, a lack of resources, stigma, language barriers or cultural values. The discussion will  
10 be structured based on the themes that emerge from the review.  
11  
12

### 13 *Patient and public involvement*

14  
15  
16 The design of this scoping review protocol did not involve patients or the public, nor will  
17 they be involved in the final scoping review.  
18

### 19 **Ethics and dissemination**

20  
21 As this scoping review is intended to synthesize the current breadth of knowledge on the  
22 help-seeking behaviors of older adults, no ethics approval is required. The results of this scoping  
23 review will be disseminated through publication in a peer-reviewed journal.  
24  
25

### 26 **Discussion**

27  
28 The results of this study will establish what is currently known about the help-seeking  
29 behaviors of older adults. To our knowledge, this scoping review protocol is the first on this  
30 topic and will identify key themes and gaps in understanding how older adults seek support for  
31 their physical and mental health needs. The results in turn, can serve as the basis for future  
32 research, such as a qualitative exploration of older adults' decision making processes when it  
33 comes to seeking formal or informal care, a study on how existing help-seeking facilitators or  
34 barriers may be influenced by the current COVID-19 pandemic, or a systematic review on  
35 specific interventions or strategies that may be effective in improving help-seeking behavior  
36 among various older adult populations. Through better understanding how older adults exhibit  
37 help-seeking behaviors and the facilitators or barriers that encourage or discourage them from  
38 seeking support, healthcare providers and program implementers can offer formal healthcare  
39 services and programs that are better tailored to suit the needs of this population. Furthermore,  
40 this synthesis of knowledge may also benefit older adult caregivers by highlighting additional  
41 supports and formal services that older adults can turn to. In identifying alternative strategies for  
42 care, such as home care services or online resources, the burden of caring for older adults does  
43 not need to fall solely on their caregivers and loved ones.  
44  
45  
46

47  
48 A secondary objective of this scoping review is to include the perspectives of ethnic  
49 minority older adults and to identify how cultural influences may impact their help-seeking  
50 behavior. Dissecting this information will help policy makers, healthcare decision makers and  
51 program implementers decide how best to allocate limited healthcare resources, such as  
52 providing them with rationale to invest in cultural competency training for staff or offering  
53 programs in multiple languages. This is a significant consideration given the rates of immigration  
54 and globalization worldwide and the importance of ensuring the representation of diverse  
55 populations in health research[8,20]. Altogether, this synthesis of literature can support the  
56  
57  
58  
59  
60

development of new evidence-based practices that will address the difficulties that older adults may experience when seeking care and provide strategies of support that acknowledge the needs of the incredibly diverse older adult demographic and their varying help-seeking behaviors.

**Authors' contributions:** KT, RC, IR, LK, and TDC contributed to the development of this manuscript. KT conceptualized the research question, designed the study, and prepared the first draft of the manuscript. TDC helped refine the research question and provide review expertise. All authors contributed to the refining of the study design, as well as to the editing and revising of this protocol. All authors have approved the final manuscript for submission.

**Funding statement:** This research received no specific grant from any funding agency in the public, commercial or not-for-profit sectors'.

**Competing interests statement:** None declared.

**Patient consent for publication:** Not required.

**Provenance and peer review:** Not commissioned; externally peer reviewed.

## References

1. Kovner CT, Mezey M, Harrington C. Who cares for older adults? Workforce implications of an aging society. *Health Aff (Millwood)* 2002;21(5):78-89. doi:10.1377/hlthaff.21.5.78
2. Zayas CE, He Z, Yuan J, et al. Examining Healthcare Utilization Patterns of Elderly Middle-Aged Adults in the United States. *Proc Int Fla AI Res Soc Conf* 2016;2016:361-366.
3. Woods, MD, Kirk, MD, Agarwal, MS, et al. Vulnerable groups and access to health care: a critical interpretive review. London: National Coordinating Centre NHS Service Delivery Organ RD (NCCSDO) 2005.
4. Lee SJ, Larson EB, Dublin S, et al. A Cohort Study of Healthcare Utilization in Older Adults with Undiagnosed Dementia. *J Gen Intern Med* 2018;33(1):13-15. doi:10.1007/s11606-017-4162-3
5. Mackenzie CS, Scott T, Mather A, et al. Older adults' help-seeking attitudes and treatment beliefs concerning mental health problems. *Am J Geriatr Psychiatry* 2008;16(12):1010-1019. doi:10.1097/JGP.0b013e31818cd3be
6. Canvin K, MacLeod CA, Windle G, et al. Seeking assistance in later life: how do older people evaluate their need for assistance?. *Age Ageing* 2018;47(3):466-473. doi:10.1093/ageing/afx189
7. Benova L, Grundy E, Ploubidis GB. Socioeconomic Position and Health-Seeking Behavior for Hearing Loss Among Older Adults in England. *J Gerontol B Psychol Sci Soc Sci* 2015;70(3):443-452. doi:10.1093/geronb/gbu024
8. George S, Duran N, Norris K. A systematic review of barriers and facilitators to minority research participation among African Americans, Latinos, Asian Americans, and Pacific Islanders. *Am J Public Health* 2014;104(2):e16-e31. doi:10.2105/AJPH.2013.301706

- 1
  - 2
  - 3
  - 4
  - 5
  - 6
  - 7
  - 8
  - 9
  - 10
  - 11
  - 12
  - 13
  - 14
  - 15
  - 16
  - 17
  - 18
  - 19
  - 20
  - 21
  - 22
  - 23
  - 24
  - 25
  - 26
  - 27
  - 28
  - 29
  - 30
  - 31
  - 32
  - 33
  - 34
  - 35
  - 36
  - 37
  - 38
  - 39
  - 40
  - 41
  - 42
  - 43
  - 44
  - 45
  - 46
  - 47
  - 48
  - 49
  - 50
  - 51
  - 52
  - 53
  - 54
  - 55
  - 56
  - 57
  - 58
  - 59
  - 60
9. Taylor, D, Richards, D. Triple jeopardy: Complexities of racism, sexism, and ageism on the experiences of mental health stigma among young Canadian Black Women of Caribbean descent. *Frontiers in Sociology* 2019;4(43). doi:10.2105/AJPH.2013.301706
10. Shefer G, Rose D, Nellums L, et al. 'Our community is the worst': the influence of cultural beliefs on stigma, relationships with family and help-seeking in three ethnic communities in London. *Int J Soc Psychiatry* 2013;59(6):535-544. doi:10.1177/0020764012443759
11. Guo S, Nguyen H, Weiss B, et al. Linkages between mental health need and help-seeking behavior among adolescents: Moderating role of ethnicity and cultural values. *J Couns Psychol* 2015;62(4):682-693. doi:10.1037/cou0000094
12. Rüdell K, Bhui K, Priebe S. Do 'alternative' help-seeking strategies affect primary care service use? A survey of help-seeking for mental distress. *BMC Public Health* 2008;8:207. doi:10.1186/1471-2458-8-207
13. Tricco AC, Lillie E, Zarin W, et al. PRISMA Extension for Scoping Reviews (PRISMA-ScR): Checklist and Explanation. *Ann Intern Med* 2018;169(7):467-473. doi:10.7326/M18-0850
14. Arksey H, O'Malley L. Scoping studies: towards a methodological framework. *Int J Soc Res Methodol* 2005;8(1):19-32. doi:10.1080/1364557032000119616
15. Barker, G. Adolescents, social support and help-seeking behaviour: an international literature review and programme consultation with recommendations for action. Geneva: World Health Organization 2007.
16. Latunji OO, Akinyemi OO. FACTORS INFLUENCING HEALTH-SEEKING BEHAVIOUR AMONG CIVIL SERVANTS IN IBADAN, NIGERIA. *Ann Ib Postgrad Med* 2018;16(1):52-60.
17. Rickwood D, Thomas K. Conceptual measurement framework for help-seeking for mental health problems. *Psychol Res Behav Manag* 2012;5:173-183. doi:10.2147/PRBM.S38707
18. Wilson CJ, Deane FP, Ciarrochi JV, et al. Measuring help seeking intentions: properties of the general help seeking questionnaire. *Canadian Journal of Counselling* 2005;39(1): 15-28.
19. Tuliao, AP, Velasquez, PA. Revisiting the General Help Seeking Questionnaire: Adaptation, exploratory factor analysis, and further validation in a Filipino college student sample. *Philippine Journal of Psychology* 2014;47(1):1-17.
20. Pakulski, J, Markowski, S. Globalisation, immigration and multiculturalism—the European and Australian experiences. *Journal of Sociology* 2014;50(1):3-9. doi:10.1177/1440783314522186

# BMJ Open

## Help-seeking Behaviors among Older Adults: A Scoping Review Protocol

|                                 |                                                                                                                                                                                                                                                                                                  |
|---------------------------------|--------------------------------------------------------------------------------------------------------------------------------------------------------------------------------------------------------------------------------------------------------------------------------------------------|
| Journal:                        | <i>BMJ Open</i>                                                                                                                                                                                                                                                                                  |
| Manuscript ID                   | bmjopen-2020-043554.R1                                                                                                                                                                                                                                                                           |
| Article Type:                   | Protocol                                                                                                                                                                                                                                                                                         |
| Date Submitted by the Author:   | 14-Jan-2021                                                                                                                                                                                                                                                                                      |
| Complete List of Authors:       | Teo, Kelly; Simon Fraser University - Vancouver<br>Churchill, Ryan; Simon Fraser University - Vancouver<br>Riadi, Indira; Simon Fraser University - Vancouver<br>Kervin, Lucy; Simon Fraser University - Vancouver<br>Cosco, Theodore; Simon Fraser University - Vancouver; University of Oxford |
| <b>Primary Subject Heading</b>: | Geriatric medicine                                                                                                                                                                                                                                                                               |
| Secondary Subject Heading:      | Health services research, Public health                                                                                                                                                                                                                                                          |
| Keywords:                       | GERIATRIC MEDICINE, PRIMARY CARE, PUBLIC HEALTH                                                                                                                                                                                                                                                  |
|                                 |                                                                                                                                                                                                                                                                                                  |

SCHOLARONE™  
Manuscripts



I, the Submitting Author has the right to grant and does grant on behalf of all authors of the Work (as defined in the below author licence), an exclusive licence and/or a non-exclusive licence for contributions from authors who are: i) UK Crown employees; ii) where BMJ has agreed a CC-BY licence shall apply, and/or iii) in accordance with the terms applicable for US Federal Government officers or employees acting as part of their official duties; on a worldwide, perpetual, irrevocable, royalty-free basis to BMJ Publishing Group Ltd ("BMJ") its licensees and where the relevant Journal is co-owned by BMJ to the co-owners of the Journal, to publish the Work in this journal and any other BMJ products and to exploit all rights, as set out in our [licence](#).

The Submitting Author accepts and understands that any supply made under these terms is made by BMJ to the Submitting Author unless you are acting as an employee on behalf of your employer or a postgraduate student of an affiliated institution which is paying any applicable article publishing charge ("APC") for Open Access articles. Where the Submitting Author wishes to make the Work available on an Open Access basis (and intends to pay the relevant APC), the terms of reuse of such Open Access shall be governed by a Creative Commons licence – details of these licences and which [Creative Commons](#) licence will apply to this Work are set out in our licence referred to above.

Other than as permitted in any relevant BMJ Author's Self Archiving Policies, I confirm this Work has not been accepted for publication elsewhere, is not being considered for publication elsewhere and does not duplicate material already published. I confirm all authors consent to publication of this Work and authorise the granting of this licence.

1  
2  
3  
4 **Article Title:** Help-seeking Behaviors among Older Adults: A Scoping Review Protocol  
5

6 **Corresponding Author:**  
7

8 Kelly Teo  
9 Simon Fraser University  
10 Department of Gerontology  
11 #2800-515 West Hastings St.  
12 Vancouver, British Columbia, Canada  
13 V6B 5K3  
14 [kteo@sfu.ca](mailto:kteo@sfu.ca)  
15

16  
17  
18 **Co-authors:**  
19

20 Ryan Churchill, Department of Gerontology, Simon Fraser University, Vancouver, Canada  
21

22 Indira Riadi, Department of Gerontology, Simon Fraser University, Vancouver, Canada  
23

24 Lucy Kervin, Department of Gerontology, Simon Fraser University, Vancouver, Canada  
25

26 Theodore D. Cosco, Department of Gerontology, Simon Fraser University, Vancouver, Canada  
27  
28

29 **Word Count:** 2320  
30  
31  
32  
33  
34  
35  
36  
37  
38  
39  
40  
41  
42  
43  
44  
45  
46  
47  
48  
49  
50  
51  
52  
53  
54  
55  
56  
57  
58  
59  
60

## Abstract

*Introduction.* Despite evidence that illustrates the unmet healthcare needs of older adults, there is limited research examining their help-seeking behavior, of which direct intervention can improve patient outcomes. Research in this area conducted with a focus on ethnic minority older adults is also needed, as their help-seeking behaviors may be influenced by various cultural factors. This scoping review aims to explore the global literature on the factors associated with help-seeking behaviors of older adults, and how cultural values and backgrounds may impact ethnic minority older adults' help-seeking behaviors in different ways.

*Methods and analysis.* The scoping review process will be guided by the methodology framework of Arksey and O'Malley and the PRISMA-ScR guidelines. The following electronic databases will be systematically searched from January 2005 onwards: MEDLINE/PubMed, Web of Science, PsycINFO, CINAHL, and Scopus. Studies of various designs and methodologies consisting of older adults aged 65 years or older, who are exhibiting help-seeking behaviors for the purpose of remedying a physical or mental health challenge will be considered for inclusion. Two reviewers will screen full texts and chart data. The results of this scoping review will be summarized quantitatively through numerical counts and qualitatively through a narrative synthesis.

*Ethics and dissemination.* As this is a scoping review of published literature, ethics approval is not required. Results will be disseminated through publication in a peer-reviewed journal.

*Discussion.* This scoping review will synthesize the current literature related to the help-seeking behaviors of older adults and ethnic minority older adults. It will identify current gaps in research and potential ways to move forward in developing or implementing strategies that support the various health needs of the diverse older adult population.

*Registration.* This scoping review protocol has been registered with the Open Science Framework (<https://osf.io/69kmx>).

## Strengths and Limitations of this study

- To our knowledge, no previous scoping review has explored the help-seeking behaviors of older adults or spoken to the factors that may impact ethnic minority older adults and their help-seeking behaviors differently
- This study protocol is guided by the methodology framework of Arksey and O'Malley and will follow a systematic approach to data synthesis
- The review will be limited to studies conducted in English and within the last 15 years to capture both the current health context and the dynamic nature of this topic
- Due to the scoping review design, quality assessments of the included articles will not be performed
- While there may be little published work in this topic area that will limit the amount of data available, this synthesis of knowledge will serve as a basis for future research and calls to action



## Introduction

Older adults encounter a number of physical and mental health challenges that often require more attention due to their persistent and chronic nature[1]. As a result, older adults use healthcare services at higher rates and account for more of the healthcare expenditures compared to younger populations[2]. Despite this, there is concern that not all older adults adequately access healthcare services, and that this population still experiences difficulties in achieving health and have unmet needs[3]. For example, various studies have found that older adults access mental health services at lower rates than expected, and certain illnesses, such as dementia and glaucoma, continue to go underdiagnosed and undertreated for this group[3-5]. Reasons for these unmet needs remain unclear in the literature and evidence is scarce[3,6]. Woods et al.[3] suggested that unmet care needs among older adults may be attributed to either the limited offers of support from healthcare providers or the lack of acceptance of such support from older adults. Another potential contributor to their unmet needs is that most studies focus on samples of older adults who are already existing service users, thereby limiting the information available on older adults that do not seek help in the first place[6]. Consequently, there is a clear lack of research examining older adults' decision making processes prior to seeking help, as well as what alternatives to formal support services these individuals may utilize instead[6]. As such, in exploring unmet needs of older adults, understanding their help-seeking behavior is one of the direct areas where intervention can improve patient outcomes[7].

For the purpose of this scoping review, the definition of help-seeking behavior will be adapted from a World Health Organization study that examined the help-seeking behavior of adolescents[8] and will be defined in the following manner[9-10]: Any action taken by an older adult who perceives themselves as having a physical or mental health challenge, with the intent to find an appropriate remedy. The type of support that individuals pursue can include seeking formal support services (e.g. from clinicians, psychologists, counselors, religious leaders) or informal support services (e.g. from family, friends, the Internet).

Within the literature, there are several models that have conceptualized help-seeking behavior. For example, the health-belief model suggests that an individual's behavior and desire to change is tied to their beliefs about their health situations and will depend on their perceived health threat or susceptibility, the benefits of change, and the support of internal or external sources (e.g. symptoms or mass media)[11-12]. In this case, individuals will use the information that they have about their health issue to decide whether they will change their behaviors[11-12]. In addition, the behavioral model of health services utilization by Aday and Andersen suggests that service use is impacted by several variables; predisposing variables, enabling variables, and need variables[12]. Expansions to this model also recognize how the environment, individual practices, and patient satisfaction can influence subsequent help-seeking behavior[12]. In this way, this scoping review will explore how these various factors may impact the diverse older adult population and discuss which factors may be more salient for this group.

In exploring help-seeking behavior among older adults, it is important to acknowledge and explore the differing experiences of ethnic minorities, due to their continued lack of representation in clinical and health research[13]. Ethnicity itself is a topic that has far-reaching cultural effects and encompasses many social issues such as stigma and discrimination that may influence help-seeking attitudes and disparities in care. For example, among ethnic minority



1  
2  
3 adolescents, studies have shown that discrimination by authorities and health care providers,  
4 traditional and cultural beliefs about mental illness, and family obligation values impact their  
5 help-seeking behavior and underutilization of services[14-16]. Furthermore, ethnic minority  
6 groups have been found to employ alternative and pluralistic help-seeking strategies as opposed  
7 to formal primary care services[17]. Given these factors explored among younger ethnic  
8 minority groups, there is reason to believe that attitudes and experiences of help-seeking for  
9 ethnic minority older adults are similarly shaped by their cultural backgrounds, values, and  
10 traditions. Subsequently, these cultural factors influence their health outcomes and the types of  
11 support that they prefer to seek out. As such, combined with the challenges that older adults  
12 already face with increasing age, there is a need to understand what factors influence ethnic  
13 minority older adults' help-seeking behavior.  
14  
15

16  
17 This scoping review intends to explore the following research question: Which factors are  
18 associated with help-seeking behavior among older adults? This review also aims to provide  
19 answers for the following sub-question: How do cultural backgrounds, values, and differences  
20 impact help-seeking behavior among various older adult populations? Due to the exploratory  
21 nature of these questions, a scoping review of papers from any country will be conducted to  
22 assess the breadth of knowledge in this area. Synthesizing this literature can help researchers,  
23 healthcare providers and key decision makers understand the current state of knowledge, identify  
24 areas for future research, and determine potential ways to influence the help-seeking behavior of  
25 older adults.  
26  
27

## 28 **Methods and analysis**

29  
30 This scoping review will be prepared in accordance with the Preferred Reporting Items  
31 for Systematic Reviews and Meta-analysis Protocols Extension for Scoping Reviews (PRISMA-  
32 ScR) guidelines[18]. A scoping review is a systematic way of exploring a topic area, in which  
33 main concepts and knowledge gaps are identified within a developing field of research[18].  
34 Unlike systematic reviews, the research questions for a scoping review are often broader and  
35 more exploratory[18] and thus appropriate for this topic due to the limited research and lack of  
36 synthesized knowledge.  
37  
38

39  
40 The review process will be guided by the five main steps set forth by Arksey and O'Malley[19]  
41 and will follow this approximate timeline:

- 42 (1) identifying the research question - completed in Fall 2020
- 43 (2) identifying relevant studies - January-February 2021
- 44 (3) study selection - February 2021
- 45 (4) charting the data – March 2021
- 46 (5) collating, summarizing, and reporting the results – April 2021

47 We will aim to complete the optional sixth stage, (6) consultation, by consulting, discussing, and  
48 verifying the results of this review with older adults. This review has been registered with the  
49 Open Science Framework (<https://osf.io/69kmx>).  
50  
51

### 52 *Step 1: Identifying the research question*

53  
54 In keeping with the exploratory nature of scoping reviews, we identified one main  
55 research question: Which factors are associated with help-seeking behavior among older adults?  
56  
57  
58  
59

1  
2  
3 As part of this, this review will also explore an additional sub-question: How do cultural  
4 backgrounds, values, and differences impact help-seeking behavior among various older adult  
5 populations?  
6

### 7 *Step 2: Identifying relevant studies*

8  
9  
10 The following electronic databases will be systematically searched: MEDLINE/PubMed,  
11 Web of Science, PsycINFO, CINAHL, and Scopus. Help-seeking behavior originated from the  
12 term ‘illness behavior’ in medical sociology[10]. While one of the earliest definitions of help-  
13 seeking behavior was provided in 1982 and a Willingness to Seek Help Questionnaire was  
14 created in 1999, an improved General Help-Seeking Questionnaire was created in 2005 to  
15 address previous methodological and instrumental constraints[10,20-21]. As such, searches will  
16 be limited from January 2005 to the date of search commencement to ensure that the literature  
17 reflects the current health context and the nature of this dynamic process.  
18  
19

20 Title, abstract and keyword fields will be searched using a combination of the following  
21 terms: (“help seek\*” OR “treatment seek\*” OR “health information seek\*” OR “healthcare  
22 seek\*” OR “care seek\*” OR “health seek\*”) AND (“older adults” OR “older people” OR  
23 “elderly” OR “seniors” OR “geriatrics”). To address the sub-question for ethnic minority older  
24 adults, we will also conduct a separate analysis using a combination of the following terms:  
25 (“help seek\*” OR “treatment seek\*” OR “health information seek\*” OR “healthcare seek\*” OR  
26 “care seek\*” OR “health seek\*”) AND (“older adults” OR “older people” OR “elderly” OR  
27 “seniors” OR “geriatrics”) AND (“immigrants” OR “ethnic minority” OR “minority  
28 populations”). An example of the electronic search strategy for MEDLINE/PubMed has been  
29 included (supplementary file). The reference lists of the included articles will also be reviewed to  
30 ensure that all relevant articles have been included. Additional search strategies may be  
31 incorporated as the review progresses and any additions or changes will be documented.  
32  
33  
34

### 35 *Step 3: Study selection*

36  
37 Two reviewers will screen all articles identified from the databases independently. Titles  
38 and abstracts will be reviewed based on the initial search and included based on the eligibility  
39 criteria described below. Duplicate articles will be removed, and full texts will be examined to  
40 create a final list of included studies. Any disagreements on the inclusion of any articles will be  
41 resolved through discussion and in consultation with a third reviewer if necessary.  
42  
43

### 44 Eligibility Criteria

45  
46 Studies of various designs and methodologies (i.e. quantitative, qualitative, mixed  
47 methods design, systematic reviews, meta-analyses, literature reviews) will be considered for this  
48 review. English or non-English studies from any country must (1) address research on the help-  
49 seeking behaviors of older adults, (2) be published from January 2005 to the date of search  
50 commencement, and (3) be full-text peer-reviewed studies. Articles outside of those defined in  
51 the inclusion criteria, such as opinion articles, dissertations, conference proceedings or  
52 discussion papers will be excluded.  
53  
54  
55  
56  
57  
58  
59  
60

1  
2  
3 In addition, the reviewed literature must include populations of (1) only older adults aged  
4 65 years or older, (2) community-dwelling older adults, (3) older adults experiencing a physical  
5 and/or mental health challenge, and (4) older adults exhibiting help-seeking behaviors or  
6 experiencing barriers/challenges to help-seeking. Literature including those aged less than 65  
7 years old, hospitalized patients, older adults living in nursing homes or other long-term care  
8 facilities as well as non-human studies will be excluded.  
9

#### 10 11 *Step 4: Charting the data*

12  
13 Data from the identified studies will be collected and charted according to key themes.  
14 From each eligible article, the reviewers will include authorship, year and journal of publication,  
15 the general characteristics of participants (i.e. age, gender and ethnicity), geographic location of  
16 study, study methods, the identified barriers or facilitators associated with help-seeking  
17 behaviors, limitations and any other key findings. A combination of Excel and a reference  
18 management software will be used to chart the data and to manage the screening process.  
19  
20

#### 21 *Step 5: Collating, summarizing, and reporting the results*

22  
23 Risk of bias will not be assessed, as this scoping review is only intended to provide an  
24 overview of the existing literature, and not to critically appraise the included articles. However,  
25 we will include a discussion of any limitations found in the included body of evidence.  
26

27  
28 The results of this scoping review will be summarized quantitatively through numerical  
29 counts (i.e. to highlight the amount and type of studies reviewed) and qualitatively through a  
30 narrative synthesis. Tables and/or charts will be used to map the study findings and provide an  
31 overview, and the screening process will be visualized through a flowchart. Given the  
32 exploratory nature of this study, any factors related to help-seeking will be considered for  
33 review. Facilitators to help-seeking will be defined as any factor that has been shown to support  
34 or encourage an older adult to seek help for their mental and/or physical health challenges[22].  
35 Barriers to help-seeking will be defined as any factor that has been shown to prevent or  
36 discourage an older adult from seeking help for their mental and/or physical health  
37 challenges[22]. These factors could include, but will not be limited to, the following: the  
38 presence or absence of caregivers, a lack of resources, stigma, language barriers or cultural  
39 values. The discussion will be structured based on the themes that emerge from the review.  
40  
41

#### 42 *Patient and public involvement*

43  
44  
45 The design of this scoping review protocol did not involve patients or the public, but we  
46 will aim to involve older adults in the review process, consulting, discussing, and verifying the  
47 results of this review.  
48

#### 49 **Ethics and dissemination**

50  
51  
52 As this scoping review is intended to synthesize the current breadth of knowledge on the  
53 help-seeking behaviors of older adults, no ethics approval is required. The results of this scoping  
54 review will be disseminated through publication in a peer-reviewed journal.  
55  
56  
57  
58  
59

## Discussion

The results of this study will establish what is currently known about the help-seeking behaviors of older adults. To our knowledge, this scoping review protocol is the first on this topic and will identify key themes and gaps in understanding how older adults seek support for their physical and mental health needs. The results in turn, can serve as the basis for future research, such as a qualitative exploration of older adults' decision making processes when it comes to seeking formal or informal care, a study on how existing help-seeking facilitators or barriers may be influenced by the current COVID-19 pandemic, or a systematic review on specific interventions or strategies that may be effective in improving help-seeking behavior among various older adult populations. Through better understanding how older adults exhibit help-seeking behaviors and the facilitators or barriers that encourage or discourage them from seeking support, healthcare providers and program implementers can offer formal healthcare services and programs that are better tailored to suit the needs of this population. Furthermore, this synthesis of knowledge may also benefit older adult caregivers by highlighting additional supports and formal services that older adults can turn to. In identifying alternative strategies for care, such as home care services or online resources, the burden of caring for older adults does not need to fall solely on their caregivers and loved ones.

A secondary objective of this scoping review is to include the perspectives of ethnic minority older adults and to identify how cultural influences may impact their help-seeking behavior. Dissecting this information will help policy makers, healthcare decision makers and program implementers decide how best to allocate limited healthcare resources, such as providing them with rationale to invest in cultural competency training for staff or offering programs in multiple languages. This is a significant consideration given the rates of immigration and globalization worldwide and the importance of ensuring the representation of diverse populations in health research[13,23]. Altogether, this synthesis of literature can support the development of new evidence-based practices that will address the difficulties that older adults may experience when seeking care and provide strategies of support that acknowledge the needs of the incredibly diverse older adult demographic and their varying help-seeking behaviors.

**Authors' contributions:** KT, RC, IR, LK, and TDC contributed to the development of this manuscript. KT conceptualized the research question, designed the study, and prepared the first draft of the manuscript. TDC helped refine the research question and provide review expertise. All authors contributed to the refining of the study design, as well as to the editing and revising of this protocol. All authors have approved the final manuscript for submission.

**Funding statement:** This research received no specific grant from any funding agency in the public, commercial or not-for-profit sectors'.

**Competing interests statement:** None declared.

**Patient consent for publication:** Not required.

**Provenance and peer review:** Not commissioned; externally peer reviewed.

## References

1. Kovner CT, Mezey M, Harrington C. Who cares for older adults? Workforce implications of an aging society. *Health Aff (Millwood)* 2002;21(5):78-89. doi:10.1377/hlthaff.21.5.78
2. Zayas CE, He Z, Yuan J, et al. Examining Healthcare Utilization Patterns of Elderly Middle-Aged Adults in the United States. *Proc Int Fla AI Res Soc Conf* 2016;2016:361-366.
3. Woods, MD, Kirk, MD, Agarwal, MS, et al. Vulnerable groups and access to health care: a critical interpretive review. London: National Coordinating Centre NHS Service Delivery Organ RD (NCCSDO) 2005.
4. Lee SJ, Larson EB, Dublin S, et al. A Cohort Study of Healthcare Utilization in Older Adults with Undiagnosed Dementia. *J Gen Intern Med* 2018;33(1):13-15. doi:10.1007/s11606-017-4162-3
5. Mackenzie CS, Scott T, Mather A, et al. Older adults' help-seeking attitudes and treatment beliefs concerning mental health problems. *Am J Geriatr Psychiatry* 2008;16(12):1010-1019. doi:10.1097/JGP.0b013e31818cd3be
6. Canvin K, MacLeod CA, Windle G, et al. Seeking assistance in later life: how do older people evaluate their need for assistance?. *Age Ageing* 2018;47(3):466-473. doi:10.1093/ageing/afx189
7. Benova L, Grundy E, Ploubidis GB. Socioeconomic Position and Health-Seeking Behavior for Hearing Loss Among Older Adults in England. *J Gerontol B Psychol Sci Soc Sci* 2015;70(3):443-452. doi:10.1093/geronb/gbu024
8. Barker, G. Adolescents, social support and help-seeking behaviour: an international literature review and programme consultation with recommendations for action. Geneva: World Health Organization 2007.
9. Latunji OO, Akinyemi OO. FACTORS INFLUENCING HEALTH-SEEKING BEHAVIOUR AMONG CIVIL SERVANTS IN IBADAN, NIGERIA. *Ann Ib Postgrad Med* 2018;16(1):52-60.
10. Rickwood D, Thomas K. Conceptual measurement framework for help-seeking for mental health problems. *Psychol Res Behav Manag* 2012;5:173-183. doi:10.2147/PRBM.S38707
11. Jones, CL, Jensen, JD, Scherr, CL, et al. The health belief model as an explanatory framework in communication research: exploring parallel, serial, and moderated mediation. *Health Commun* 2015;30(6),566-576. doi: 10.1080/10410236.2013.873363
12. Aday, LA, Andersen, RM. Health care utilization and behavior, models of. In: Armitage, P, Colton, T. Encyclopedia of biostatistics. 2nd ed. Chichester, West Sussex, England: John Wiley & Sons, Ltd. 2005. doi:10.1002/0470011815.b2a4a010
13. George S, Duran N, Norris K. A systematic review of barriers and facilitators to minority research participation among African Americans, Latinos, Asian Americans, and Pacific Islanders. *Am J Public Health* 2014;104(2):e16-e31. doi:10.2105/AJPH.2013.301706
14. Taylor, D, Richards, D. Triple jeopardy: Complexities of racism, sexism, and ageism on the experiences of mental health stigma among young Canadian Black Women of Caribbean descent. *Frontiers in Sociology* 2019;4(43). doi:10.2105/AJPH.2013.301706
15. Shefer G, Rose D, Nellums L, et al. 'Our community is the worst': the influence of cultural beliefs on stigma, relationships with family and help-seeking in three ethnic



- 1  
2  
3 communities in London. *Int J Soc Psychiatry* 2013;59(6):535-544.  
4 doi:10.1177/0020764012443759
- 5  
6 16. Guo S, Nguyen H, Weiss B, et al. Linkages between mental health need and help-seeking  
7 behavior among adolescents: Moderating role of ethnicity and cultural values. *J Couns*  
8 *Psychol* 2015;62(4):682-693. doi:10.1037/cou0000094
- 9  
10 17. Rüdell K, Bhui K, Priebe S. Do 'alternative' help-seeking strategies affect primary care  
11 service use? A survey of help-seeking for mental distress. *BMC Public Health*  
12 2008;8:207. doi:10.1186/1471-2458-8-207
- 13  
14 18. Tricco AC, Lillie E, Zarin W, et al. PRISMA Extension for Scoping Reviews (PRISMA-  
15 ScR): Checklist and Explanation. *Ann Intern Med* 2018;169(7):467-473.  
16 doi:10.7326/M18-0850
- 17  
18 19. Arksey H, O'Malley L. Scoping studies: towards a methodological framework. *Int J Soc*  
19 *Res Methodol* 2005;8(1):19-32. doi:10.1080/1364557032000119616
- 20  
21 20. Wilson CJ, Deane FP, Ciarrochi JV, et al. Measuring help seeking intentions: properties  
22 of the general help seeking questionnaire. *Canadian Journal of Counselling* 2005;39(1):  
23 15-28.
- 24  
25 21. Tuliao, AP, Velasquez, PA. Revisiting the General Help Seeking Questionnaire:  
26 Adaptation, exploratory factor analysis, and further validation in a Filipino college  
27 student sample. *Philippine Journal of Psychology* 2014;47(1):1-17.
- 28  
29 22. Gulliver, A, Griffiths, KM, Christensen, H. Barriers and facilitators to mental health help-  
30 seeking for young elite athletes: a qualitative study. *BMC psychiatry* 2012;12(1):157.  
31 doi:10.1186/1471-244X-12-157
- 32  
33 23. Pakulski, J, Markowski, S. Globalisation, immigration and multiculturalism—the  
34 European and Australian experiences. *Journal of Sociology* 2014;50(1):3-9.  
35 doi:10.1177/1440783314522186  
36  
37  
38  
39  
40  
41  
42  
43  
44  
45  
46  
47  
48  
49  
50  
51  
52  
53  
54  
55  
56  
57  
58  
59  
60

## Search Strategy Example

### **From MEDLINE/PubMed:**

1. Search: (“help seek\*” OR “treatment seek\*” OR “health information seek\*” OR “healthcare seek\*” OR “care seek\*” OR “health seek\*”) AND (“older adults” OR “older people” OR “elderly” OR “seniors” OR “geriatrics”)

(“help seek\*”[Title/Abstract] OR “treatment seek\*”[Title/Abstract] OR “health information seek\*”[Title/Abstract] OR “healthcare seek\*”[Title/Abstract] OR “care seek\*”[Title/Abstract] OR “health seek\*”[Title/Abstract]) AND (“older adults”[Title/Abstract] OR “older people”[Title/Abstract] OR “elderly”[Title/Abstract] OR “seniors”[Title/Abstract] OR “geriatrics”[Title/Abstract])

2. Search: ("help seek\*" OR "treatment seek\*" OR "health information seek\*" OR "healthcare seek\*" OR "care seek\*" OR "health seek\*") AND ("older adults" OR "older people" OR "elderly" OR "seniors" OR "geriatrics") AND ("immigrants" OR "ethnic minority" OR "minority populations")

("help seek\*" [Title/Abstract] OR "treatment seek\*" [Title/Abstract] OR "health information seek\*" [Title/Abstract] OR "healthcare seek\*" [Title/Abstract] OR "care seek\*" [Title/Abstract] OR "health seek\*" [Title/Abstract]) AND ("older adults" [Title/Abstract] OR "older people" [Title/Abstract] OR "elderly" [Title/Abstract] OR "seniors" [Title/Abstract] OR "geriatrics" [Title/Abstract]) AND ("immigrants" [Title/Abstract] OR "ethnic minority" [Title/Abstract] OR "minority populations" [Title/Abstract])

## Preferred Reporting Items for Systematic reviews and Meta-Analyses extension for Scoping Reviews (PRISMA-ScR) Checklist

| SECTION                                               | ITEM | PRISMA-ScR CHECKLIST ITEM                                                                                                                                                                                                                                                                                  | REPORTED ON PAGE # |
|-------------------------------------------------------|------|------------------------------------------------------------------------------------------------------------------------------------------------------------------------------------------------------------------------------------------------------------------------------------------------------------|--------------------|
| <b>TITLE</b>                                          |      |                                                                                                                                                                                                                                                                                                            |                    |
| Title                                                 | 1    | Identify the report as a scoping review.                                                                                                                                                                                                                                                                   | 1                  |
| <b>ABSTRACT</b>                                       |      |                                                                                                                                                                                                                                                                                                            |                    |
| Structured summary                                    | 2    | Provide a structured summary that includes (as applicable): background, objectives, eligibility criteria, sources of evidence, charting methods, results, and conclusions that relate to the review questions and objectives.                                                                              | 2                  |
| <b>INTRODUCTION</b>                                   |      |                                                                                                                                                                                                                                                                                                            |                    |
| Rationale                                             | 3    | Describe the rationale for the review in the context of what is already known. Explain why the review questions/objectives lend themselves to a scoping review approach.                                                                                                                                   | 3-4                |
| Objectives                                            | 4    | Provide an explicit statement of the questions and objectives being addressed with reference to their key elements (e.g., population or participants, concepts, and context) or other relevant key elements used to conceptualize the review questions and/or objectives.                                  | 4                  |
| <b>METHODS</b>                                        |      |                                                                                                                                                                                                                                                                                                            |                    |
| Protocol and registration                             | 5    | Indicate whether a review protocol exists; state if and where it can be accessed (e.g., a Web address); and if available, provide registration information, including the registration number.                                                                                                             | 2,4                |
| Eligibility criteria                                  | 6    | Specify characteristics of the sources of evidence used as eligibility criteria (e.g., years considered, language, and publication status), and provide a rationale.                                                                                                                                       | 5-6                |
| Information sources*                                  | 7    | Describe all information sources in the search (e.g., databases with dates of coverage and contact with authors to identify additional sources), as well as the date the most recent search was executed.                                                                                                  | 5                  |
| Search                                                | 8    | Present the full electronic search strategy for at least 1 database, including any limits used, such that it could be repeated.                                                                                                                                                                            | 5                  |
| Selection of sources of evidence†                     | 9    | State the process for selecting sources of evidence (i.e., screening and eligibility) included in the scoping review.                                                                                                                                                                                      | 5-6                |
| Data charting process‡                                | 10   | Describe the methods of charting data from the included sources of evidence (e.g., calibrated forms or forms that have been tested by the team before their use, and whether data charting was done independently or in duplicate) and any processes for obtaining and confirming data from investigators. | 6                  |
| Data items                                            | 11   | List and define all variables for which data were sought and any assumptions and simplifications made.                                                                                                                                                                                                     | 5-6                |
| Critical appraisal of individual sources of evidence§ | 12   | If done, provide a rationale for conducting a critical appraisal of included sources of evidence; describe the methods used and how this information was used in any data synthesis (if appropriate).                                                                                                      | N/A                |

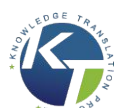



| SECTION                                       | ITEM | PRISMA-ScR CHECKLIST ITEM                                                                                                                                                                       | REPORTED ON PAGE # |
|-----------------------------------------------|------|-------------------------------------------------------------------------------------------------------------------------------------------------------------------------------------------------|--------------------|
| Synthesis of results                          | 13   | Describe the methods of handling and summarizing the data that were charted.                                                                                                                    | 6                  |
| <b>RESULTS</b>                                |      |                                                                                                                                                                                                 |                    |
| Selection of sources of evidence              | 14   | Give numbers of sources of evidence screened, assessed for eligibility, and included in the review, with reasons for exclusions at each stage, ideally using a flow diagram.                    | 6                  |
| Characteristics of sources of evidence        | 15   | For each source of evidence, present characteristics for which data were charted and provide the citations.                                                                                     | 6                  |
| Critical appraisal within sources of evidence | 16   | If done, present data on critical appraisal of included sources of evidence (see item 12).                                                                                                      | N/A                |
| Results of individual sources of evidence     | 17   | For each included source of evidence, present the relevant data that were charted that relate to the review questions and objectives.                                                           | 6                  |
| Synthesis of results                          | 18   | Summarize and/or present the charting results as they relate to the review questions and objectives.                                                                                            | 6                  |
| <b>DISCUSSION</b>                             |      |                                                                                                                                                                                                 |                    |
| Summary of evidence                           | 19   | Summarize the main results (including an overview of concepts, themes, and types of evidence available), link to the review questions and objectives, and consider the relevance to key groups. | 7                  |
| Limitations                                   | 20   | Discuss the limitations of the scoping review process.                                                                                                                                          | 7                  |
| Conclusions                                   | 21   | Provide a general interpretation of the results with respect to the review questions and objectives, as well as potential implications and/or next steps.                                       | 7                  |
| <b>FUNDING</b>                                |      |                                                                                                                                                                                                 |                    |
| Funding                                       | 22   | Describe sources of funding for the included sources of evidence, as well as sources of funding for the scoping review. Describe the role of the funders of the scoping review.                 | 7                  |

JBI = Joanna Briggs Institute; PRISMA-ScR = Preferred Reporting Items for Systematic reviews and Meta-Analyses extension for Scoping Reviews.

\* Where *sources of evidence* (see second footnote) are compiled from, such as bibliographic databases, social media platforms, and Web sites.

† A more inclusive/heterogeneous term used to account for the different types of evidence or data sources (e.g., quantitative and/or qualitative research, expert opinion, and policy documents) that may be eligible in a scoping review as opposed to only studies. This is not to be confused with *information sources* (see first footnote).

‡ The frameworks by Arksey and O'Malley (6) and Levac and colleagues (7) and the JBI guidance (4, 5) refer to the process of data extraction in a scoping review as data charting.

§ The process of systematically examining research evidence to assess its validity, results, and relevance before using it to inform a decision. This term is used for items 12 and 19 instead of "risk of bias" (which is more applicable to systematic reviews of interventions) to include and acknowledge the various sources of evidence that may be used in a scoping review (e.g., quantitative and/or qualitative research, expert opinion, and policy document).

From: Tricco AC, Lillie E, Zarin W, O'Brien KK, Colquhoun H, Levac D, et al. PRISMA Extension for Scoping Reviews (PRISMA-ScR): Checklist and Explanation. *Ann Intern Med.* 2018;169:467–473. doi: [10.7326/M18-0850](https://doi.org/10.7326/M18-0850).

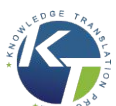

St. Michael's

Inspired Care.  
Inspiring Science.

For peer review only - <http://bmjopen.bmj.com/site/about/guidelines.xhtml>
