# Supplementary material for: Help-seeking behaviours among older adults: a scoping review protocol
Source: PubMed Central journal article supplement — BMJ Open. 2021 Feb 16;11(2):e043554. doi: 10.1136/bmjopen-2020-043554 (PMC7888354; doi:10.1136/bmjopen-2020-043554), 2021-02-16
Supplement: bmjopen-2020-043554supp001.pdf [file bmjopen-2020-043554supp001.pdf]

### **Search Strategy Example**

#### **From MEDLINE/PubMed:**

1. Search: ("help seek\*" OR "treatment seek\*" OR "health information seek\*" OR "healthcare seek\*" OR "care seek\*" OR "health seek\*") AND ("older adults" OR "older people" OR "elderly" OR "seniors" OR "geriatrics")

("help seek\*[All Fields] OR "treatment seek\*[All Fields] OR "health information seek\*[All Fields] OR "healthcare seek\*[All Fields] OR "care seek\*[All Fields] OR "health seek\*[All Fields]) AND ("older adults"[All Fields] OR "older people"[All Fields] OR "elderly"[All Fields] OR "seniors"[All Fields] OR "geriatrics"[All Fields])

2. Search: ("help seek\*" OR "treatment seek\*" OR "health information seek\*" OR "healthcare seek\*" OR "care seek\*" OR "health seek\*") AND ("older adults" OR "older people" OR "elderly" OR "seniors" OR "geriatrics") AND ("immigrants" OR "ethnic minority" OR "minority populations")

("help seek\*[All Fields] OR "treatment seek\*[All Fields] OR "health information seek\*[All Fields] OR "healthcare seek\*[All Fields] OR "care seek\*[All Fields] OR "health seek\*[All Fields]) AND ("older adults"[All Fields] OR "older people"[All Fields] OR "elderly"[All Fields] OR "seniors"[All Fields] OR "geriatrics"[All Fields]) AND ("immigrants"[All Fields] OR "ethnic minority"[All Fields] OR "minority populations"[All Fields])
